# Supplementary material for: Structure and Oligonucleotide Binding Efficiency of Differently Prepared Click Chemistry-Type DNA Microarray Slides Based on 3-Azidopropyltrimethoxysilane
Source: MDPI journal article supplement (doi:10.3390/ma14112855), 2021-05-26
Supplement: s1 [file s1]

## Supporting Information

### Structure and Oligonucleotide Binding Efficiency of Differently Prepared Click Chemistry-Type DNA Microarray Slides Based on 3-Azidopropyltrimethoxysilane

Emilia Frydrych-Tomczak <sup>1</sup>, Tomasz Ratajczak <sup>2</sup>, Łukasz Kościński <sup>3</sup>, Agnieszka Ranecka <sup>3</sup>, Natalia Michalak <sup>3</sup>, Tadeusz Luciński <sup>3</sup>, Hieronim Maciejewski <sup>1,4</sup>, Stefan Jurga <sup>5</sup>, Mikołaj Lewandowski <sup>3,5,\*</sup> and Marcin K. Chmielewski <sup>2,\*</sup>

<sup>1</sup> Poznań Science and Technology Park, Adam Mickiewicz University Foundation, Rubież 46, 61-612 Poznań, Poland

<sup>2</sup> Institute of Bioorganic Chemistry, Polish Academy of Sciences, Noskowskiego 12/14, 61-704 Poznań, Poland

<sup>3</sup> Institute of Molecular Physics, Polish Academy of Sciences, M. Smoluchowskiego 17, 60-179 Poznań, Poland

<sup>4</sup> Faculty of Chemistry, Adam Mickiewicz University, Uniwersytetu Poznańskiego 8, 61-614 Poznań, Poland

<sup>5</sup> NanoBioMedical Centre, Adam Mickiewicz University, Wszechnicy Piastowskiej 3, 61-614 Poznań, Poland

\* Correspondence: [chmielewskimk@ibch.poznan.pl](mailto:chmielewskimk@ibch.poznan.pl), [lewandowski@amu.edu.pl](mailto:lewandowski@amu.edu.pl)

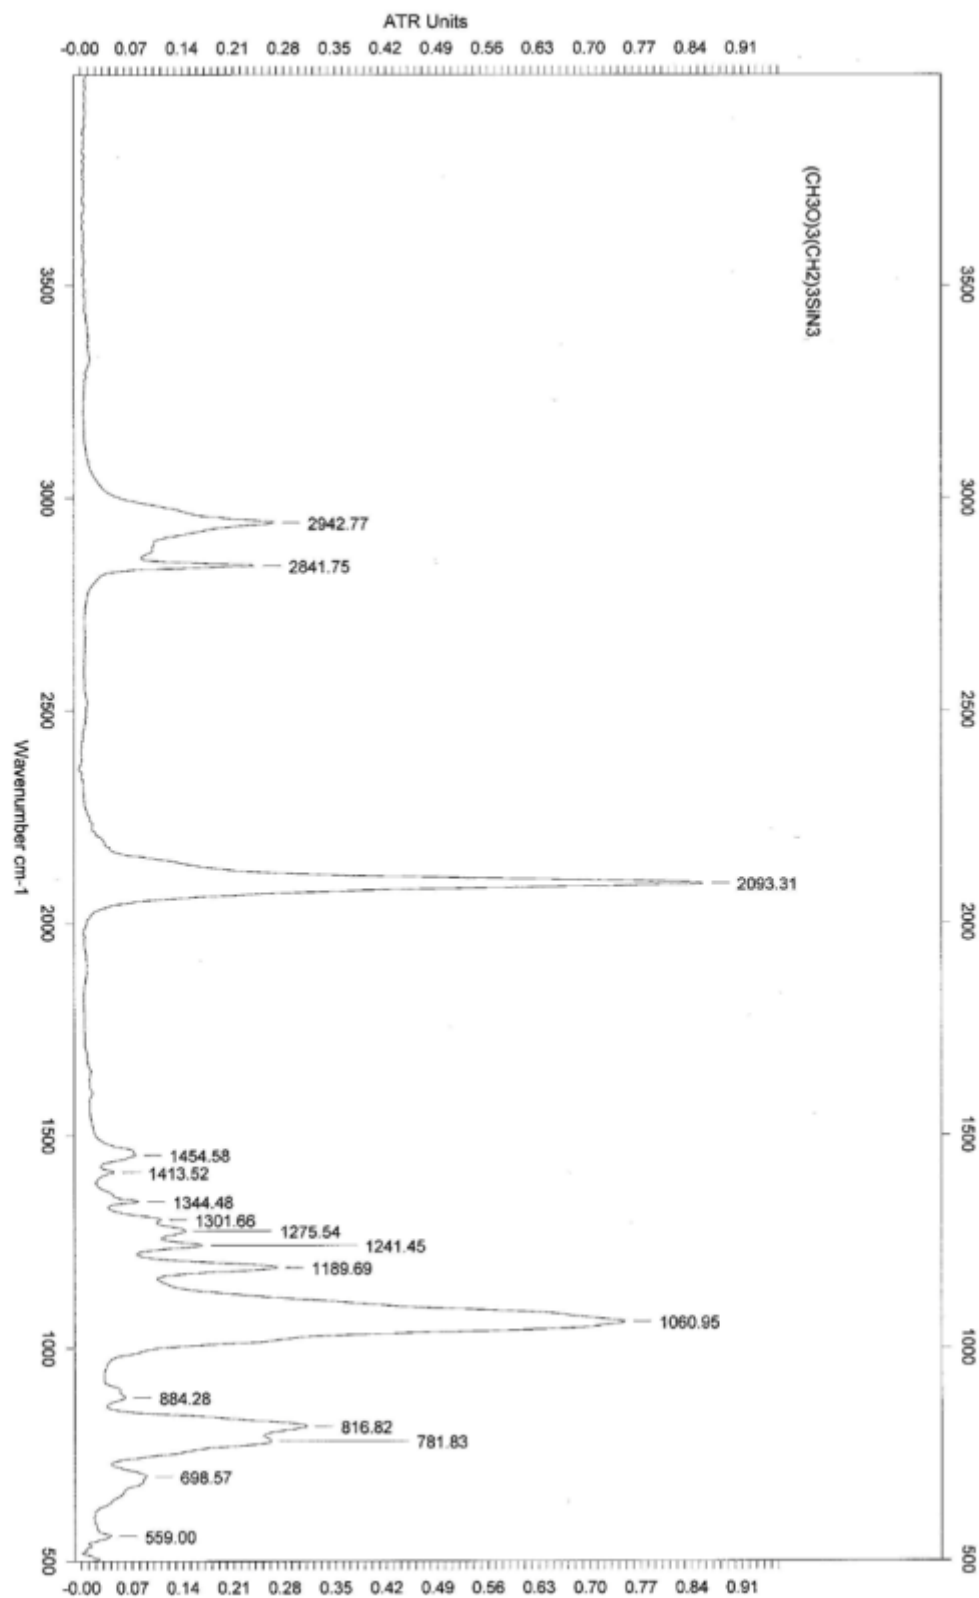

**Figure S1.** FT-IR spectrum of 3-azidopropyltrimethoxysilane.

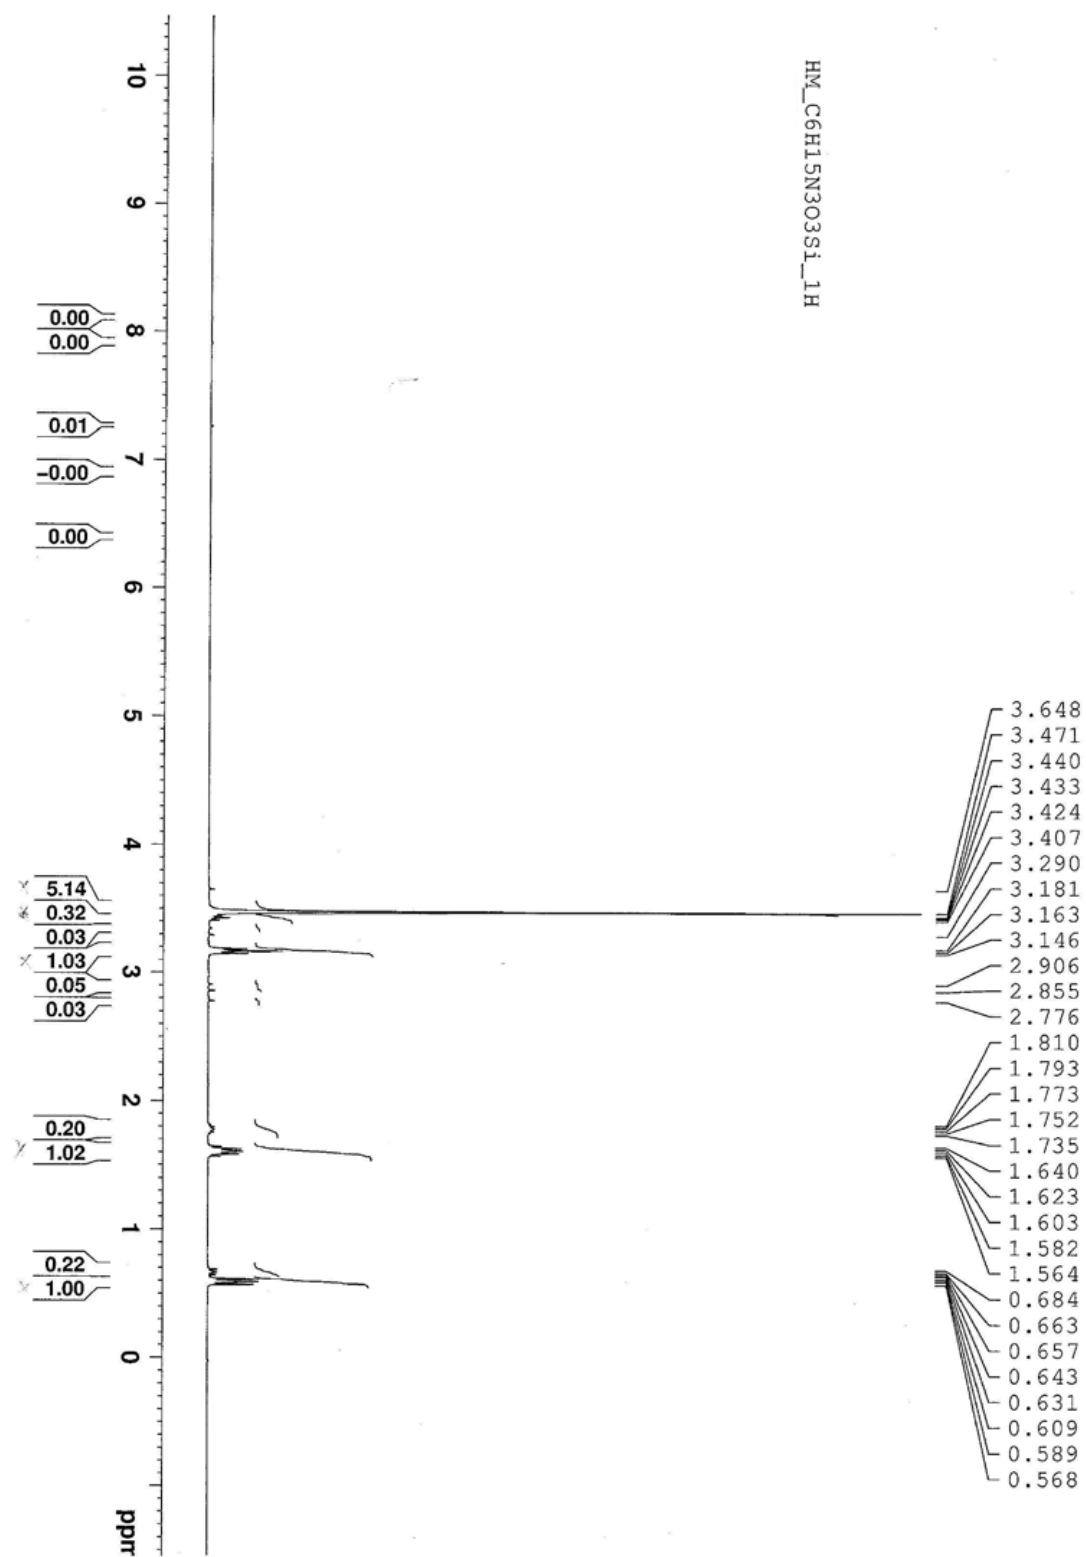

Figure S2.  $^1\text{H}$  NMR spectrum of 3-azidopropyltrimethoxysilane.

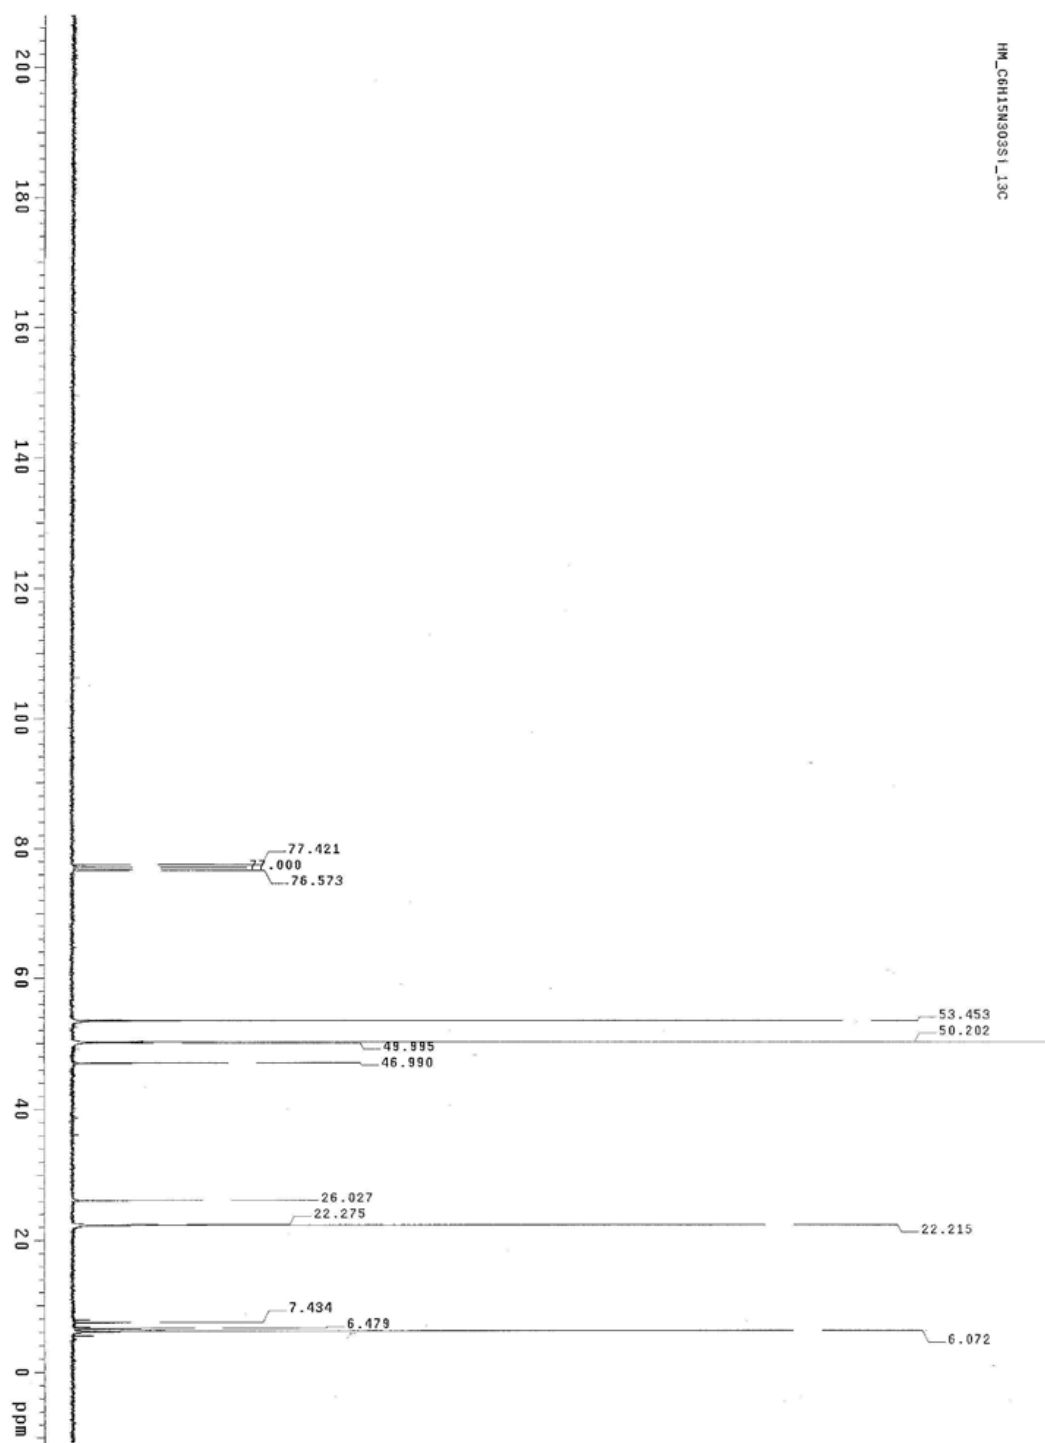

**Figure S3.**  $^{13}\text{C}$  NMR spectrum of 3-azidopropyltrimethoxysilane.

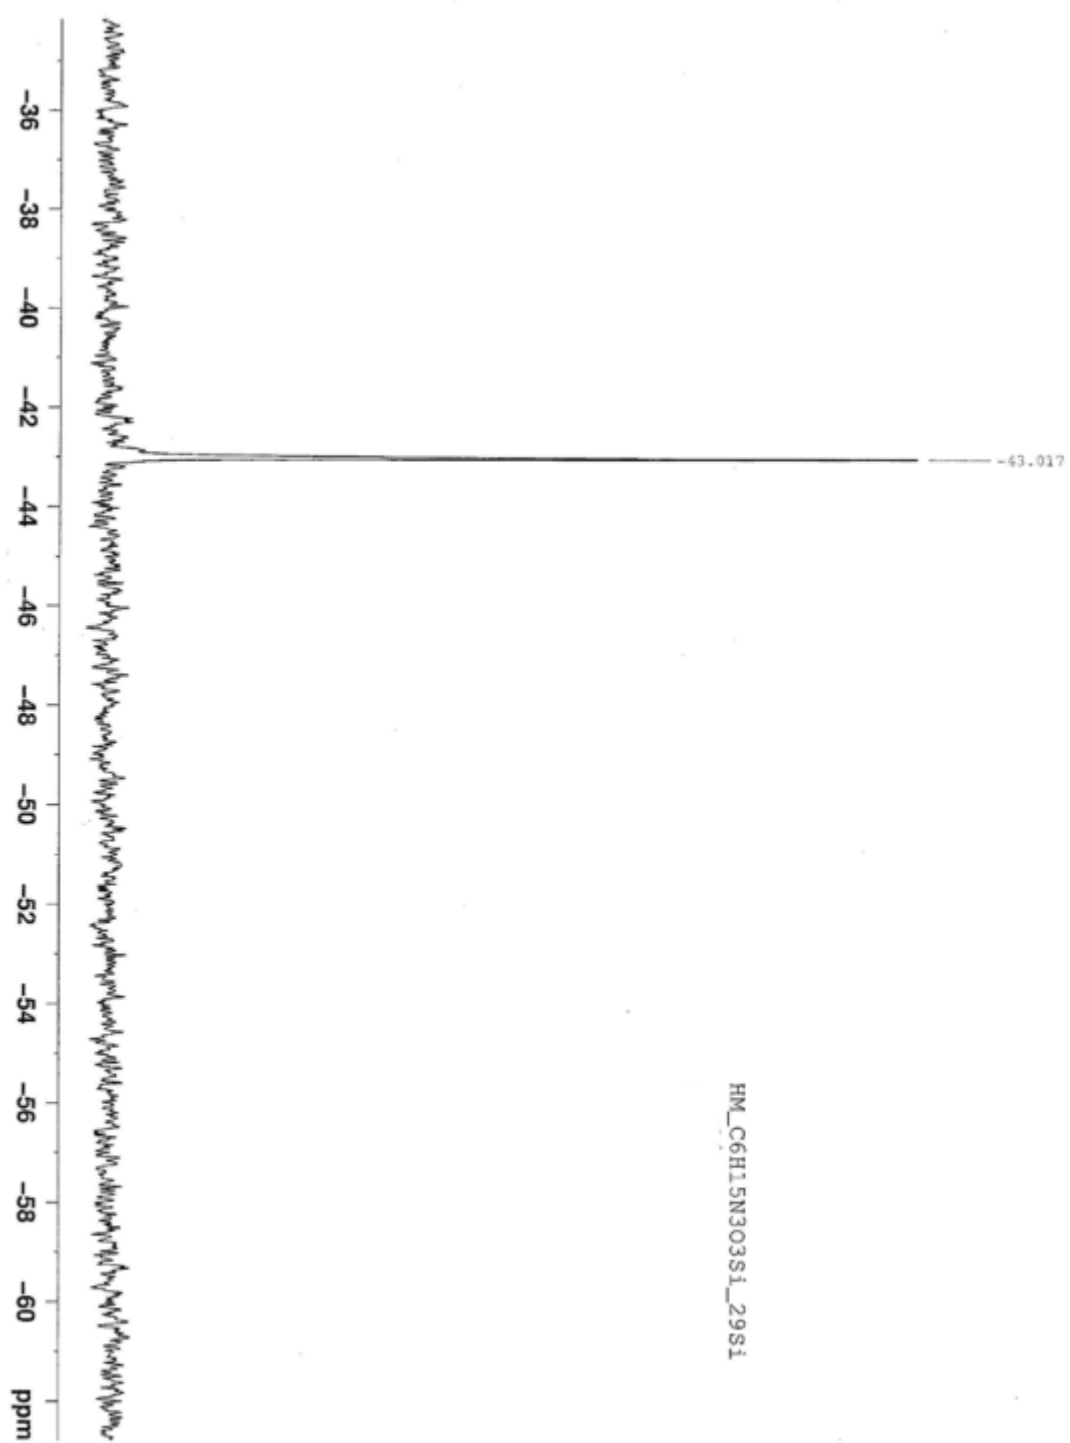

**Figure S4.**  $^{29}\text{Si}$  NMR spectrum of 3-azidopropyltrimethoxysilane.

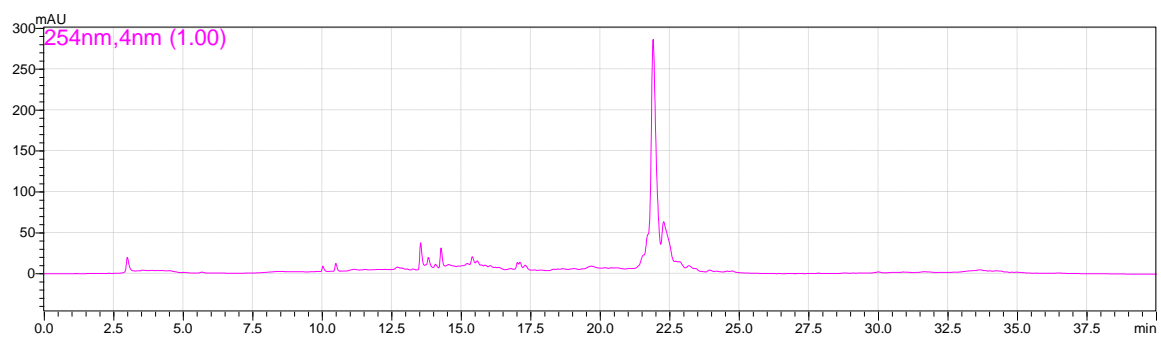

**Figure S5.** HPLC chromatogram of ODN-8.

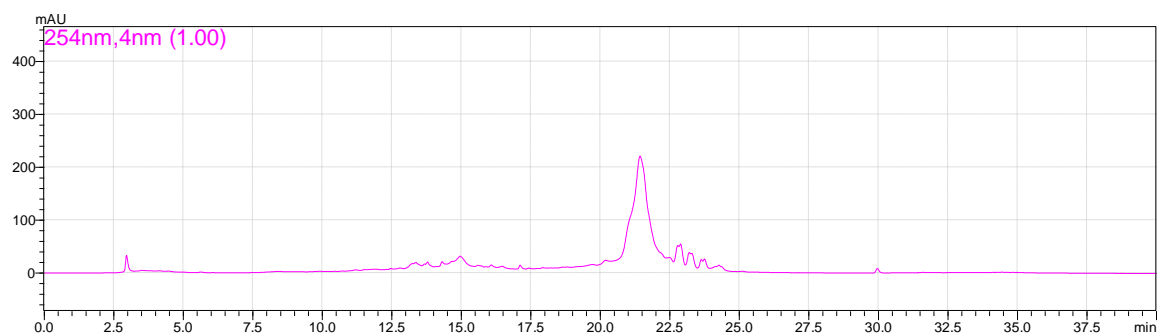

**Figure S6.** HPLC chromatogram of ODN-12.

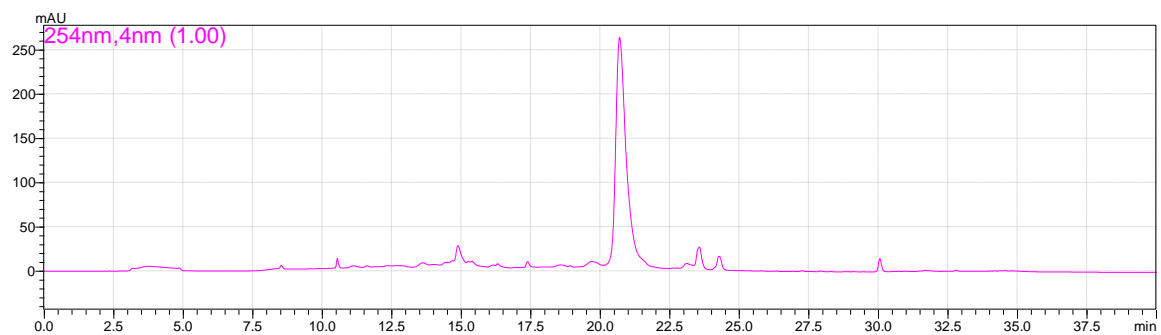

**Figure S7.** HPLC chromatogram of ODN-16.

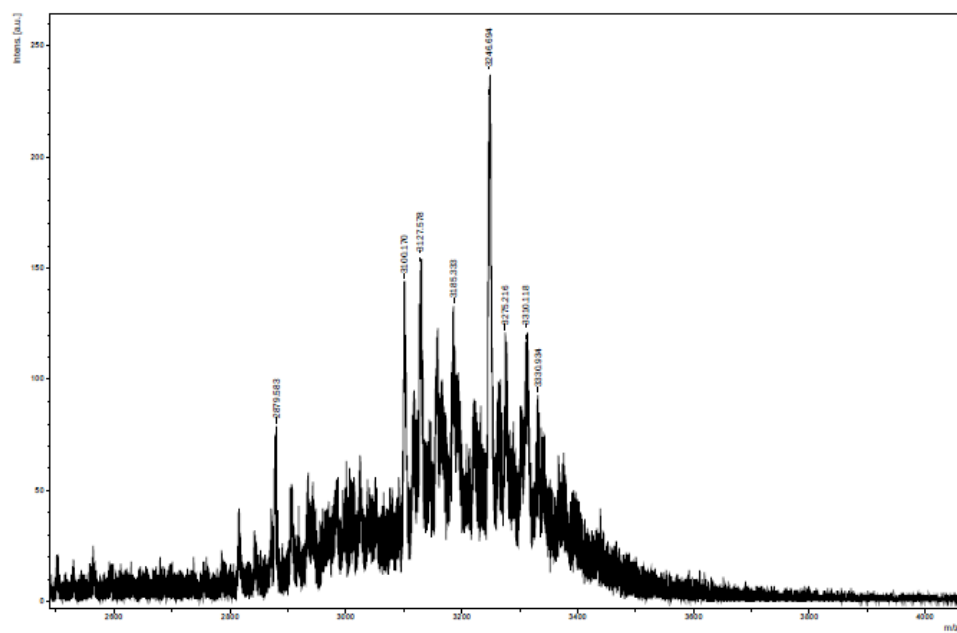

**Figure S8.** MS TOF spectrum of ODN-8.

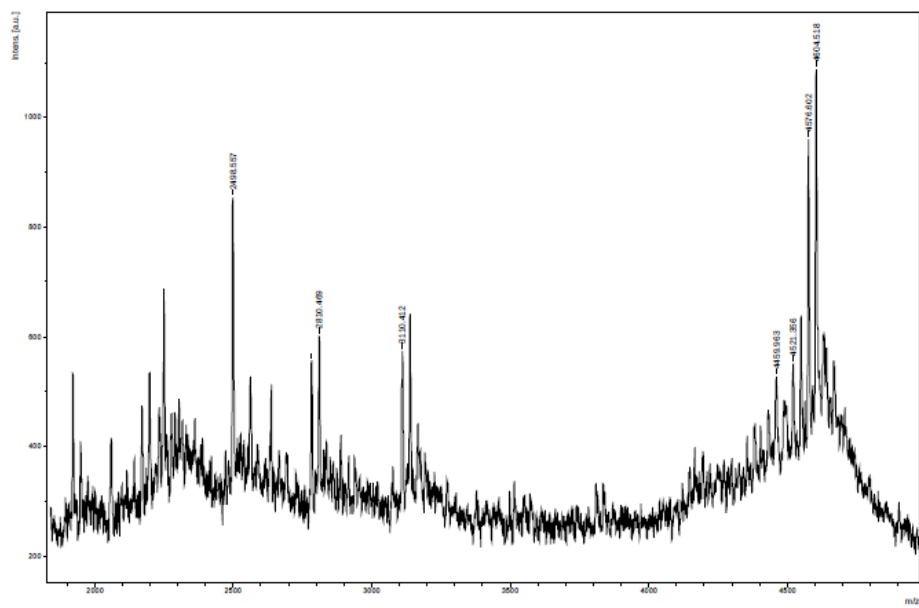

**Figure S9.** MS TOF spectrum of ODN-12.

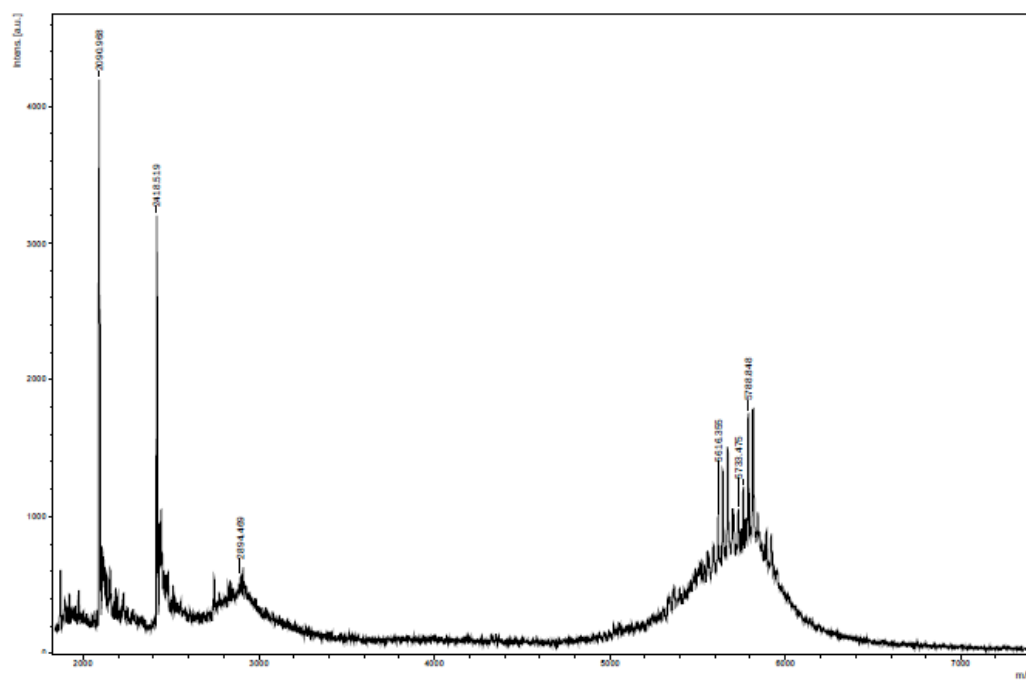

**Figure S10.** MS TOF spectrum of ODN-16.
